**Type:**

Research article

**Title:**

*A seleno-hormetine protects bone marrow hematopoietic cells against ionizing radiation-induced toxicity.*

**Short title:**

*Seleno-hormesis in radiation-induced bone marrow damage*

**Authors:**

**Bartolini Desirée<sup>1#§</sup>, Wang Yanzhong<sup>2#</sup>, Zhang Jie<sup>3</sup>, Giustarini Daniela<sup>4</sup>, Rossi Ranieri<sup>5</sup>, Wang, Gavin Y.<sup>2</sup>, Torquato Pierangelo<sup>1</sup>, Townsend, Danyelle M.<sup>3</sup>, Tew Kenneth D.<sup>3#</sup>, and Galli Francesco<sup>1#</sup>.**

**Affiliations:**

1. Department of Pharmaceutical Sciences, University of Perugia, 06126 Perugia, Italy
2. Department of Pathology and Laboratory Medicine, Medical University of South Carolina, Charleston, SC 29425, USA.
3. Department of Cell and Molecular Pharmacology and Experimental Therapeutics, Medical University of South Carolina, Charleston, SC 29401, USA.
4. Department of Medicine, Surgery and Neuroscience, University of Siena, 53100 Siena, Italy.
5. Department of Life Sciences, Laboratory of Pharmacology and Toxicology, University of Siena, 53100 Siena, Italy.

**# these Authors equally contributed to this research**

**§Corresponding Author:**

Bartolini Desirée  
FIRC-AIRC Fellow of research at Clinical Biochemistry and Nutrition Lab  
Department of Pharmaceutical Sciences,  
University of Perugia, 06126 Perugia, Italy  
Pole of Via del Giochetto, building B, 2<sup>nd</sup> floor.  
Tel. +39 075 585 7445  
e-mail address: [desirex85@hotmail.it](mailto:desirex85@hotmail.it)

34 **Abstract**

35 2,2'-diselenyldibenzoic acid (DSBA) is a mild thiol peroxidase agent presently in preclinical  
36 development. This study reports that the drug has novel seleno-hormetic properties in both murine  
37 bone marrow and human liver cells. According with previous *in vitro* findings, mechanistic aspects  
38 of such properties were confirmed to include the activation of Nrf2 transcription factor and an  
39 increased expression of downstream stress response genes in the liver and in hematopoietic stem and  
40 progenitor cells of the myeloid lineage. These genes include glutathione S-transferase that is reported  
41 to represent a major player in the metabolism and pharmacological function of seleno-organic  
42 compounds. As a practical application, DSBA administration prevented bone marrow toxicities  
43 following acute exposure to sub-lethal doses of ionizing radiation in C57 BL/6 mice.

44 In conclusion, this study demonstrates for the first time the pharmacological properties of DSBA *in*  
45 *vivo*. The findings suggest applications for this selenohormetine in radioprotection and prevention  
46 protocols.

47

48 **Word:** 149

49

50 **Key words:** selenium; diselenides; Nrf2; ionizing radiations; hormesis; seleno-hormetine; oxidative  
51 stress; glutathione; glutathione S-transferase P; S-glutathionylation.

## 52 1. Introduction

53

54 Inorganic and organic forms of selenium have extensively been investigated as pharmacological  
55 agents with applications in either cancer chemoprevention (cytoprotective effects) or therapy of drug-  
56 resistant tumors (recently reviewed in [1]). These compounds act as thiol peroxidases (TP) and  
57 agonists of drug metabolism genes associated with the detoxification of cellular electrophiles [2].

58 Recently, we demonstrated that structural modifications of the diphenyldiselenide [(PhSe)<sub>2</sub>] scaffold,  
59 can lead to mitigation of the redox cycling activities of the Se–Se functional group of this potent Se-  
60 organic thiol peroxidase (SeTP) [3], thus lessening its cytotoxicity [4]. 2,2'-diselenyldibenzoic acid  
61 (DSBA) is the resultant diselenide generated by this strategy that possesses *in vitro* pharmacological  
62 properties and insignificant toxicity. However, its TP activity is sufficient to stimulate an efficient  
63 adaptive redox stress response that increases protection against H<sub>2</sub>O<sub>2</sub>-induced injury in both murine  
64 embryonic fibroblasts and human hepatocytes [4]. The hormetic effect of DSBA involves the  
65 activation of the transcription factor NF-E2-Related Factor 2 (Nrf2) and is influenced by the  
66 expression of the isoform P of the enzyme glutathione S-transferase (GSTP). GSTs are among the  
67 most abundant Cys-containing cellular proteins of the liver and were the first identified to react with  
68 Se-organic compounds thus promoting their hepatic metabolism [5,6]. In this context, recent studies  
69 by some of us demonstrated that the GSTP isoform is critical for detoxification and maintenance of  
70 redox homeostasis in cells treated with SeTP [1]. The importance of this protein in regulating cellular  
71 signaling events and in initiating response to oxidative stress has been reported in some detail and  
72 implies that it may act in concert with Nrf2 to regulate a variety of cellular pathways [7].

73 In the present study, *in vitro* results are extended into an animal model of oxidant stress by acute  
74 exposure to ionizing radiations (IR), to examine whether DSBA had sufficient hormetic activity to  
75 prevent damage to hematopoietic stem and progenitor cells from bone marrow (BM), a major  
76 biological consequence of radiation exposure in this model [8].

77

## 78 2. Materials and Methods

79

### 80 2.1 Seleno-Compounds

81

82 2,2'-diselenyldibenzoic acid (DSBA) was synthesized as reported in [4]. Purity >98.5%.

83 Ebselen (E3520) and diphenyl-diselenide[PhSe]<sub>2</sub>] (180629; purity 98%) were purchased from Sigma-  
84 Aldrich and all compounds were dissolved in DMSO.

85

## 86 2.2 *In vitro studies in human liver cell lines*

87

88 HepG2 human hepatocarcinoma cells were maintained in MEM medium (Gibco, Life Technology)  
89 supplemented with 10% fetal bovine serum (Gibco, Life Technology) in the presence of 100 U/ml  
90 penicillin and 100 mg/ml streptomycin (Sigma-Aldrich, USA). HepaRG human progenitor hepatic  
91 cells (Thermo Fisher Scientific) were maintained according to the manufacturer's recommendations.  
92 Briefly, the cells were grown in William's E medium (Thermo Fisher Scientific) supplemented with  
93 Glutamax (Gibco), 5 ug/mL human insulin (Sigma-Aldrich) and 50  $\mu$ M Hydrocortisone  
94 hemisuccinate (Sigma-Aldrich) for 14 days. All cells were kept at 37°C in a humidified 5% CO<sub>2</sub> cell  
95 culture incubator and were passaged using trypsin-EDTA (Euroclone).

96

## 97 2.3 *Cellular thiols and glutathionylation*

98

99 Cellular thiols were assessed by HPLC analysis with fluorescence detection after derivatization with  
100 monobromobimane (mBrB, Calbiochem). For disulfide analysis, aliquots of samples were derivatized  
101 with N-ethylmaleimide (Sigma-Aldrich) to mask reduced thiols and then dithiothreitol (DTT, Sigma-  
102 Aldrich) was used to reduce disulfide bridges, according to Rossi et al. [9].

103 The Cayman's Glutathionylated protein detection kit (Cayman Chemical, Item No.10010721) was  
104 used to assess PSSG in MEFs. The method allows a direct measurement of S-glutathionylated  
105 proteins in whole (permeabilized) cells by flow cytometry (Attune NxT Acoustic Focusing Cytometer,  
106 Thermo Fisher Scientific).

107

## 108 2.4 *In vivo and ex vivo studies*

109

110 Male C57 BL/6 mice purchased from the Jackson Laboratories (Bar Harbor, ME) and were used for  
111 *in vivo* experiments. The animals were housed five per cage in the Hollings Cancer Center AAALAC-  
112 certified animal facilities at the Medical University of South Carolina (MUSC). Animals received  
113 food and water ad libitum. All mice were used at approximately 8 -12 weeks of age. The Institutional  
114 Animal Care and Use Committee of MUSC approved all experimental procedures used in this study.  
115 DSBA was dissolved in DMSO and then diluted with 30% PEG2000/PBS. Mice were administered  
116 with a single dose of the diluted DSBA solution at 10 mg/Kg and 50 mg/Kg via intraperitoneal  
117 injection. Control animals were treated with the vehicle. The groups of mice included 3 animals each.  
118 Mice were scarified 24 hrs after the treatment to collect blood, bone marrow (BM) and liver samples.

119

120 2.5 *Total-Body Irradiation (TBI) and DSBA treatment*

121

122 To investigate the protection against IR injury, the number of BM HSPCs was evaluated in animals  
123 that received a dose of 50 mg/kg DSBA 4 h before TBI exposure. Mice were exposed to 3 Gy of  
124 irradiation using a J. L. Shepherd Model 143 <sup>137</sup>Cs gamma irradiator at a dose rate of 2.0 Gy/min as  
125 described previously [10]. Twenty-four hours after TBI, mice were euthanized by CO<sub>2</sub> suffocation  
126 followed by cervical dislocation, and the femora and tibiae were immediately harvested from the mice  
127 for the isolation of bone marrow mononuclear cells as described below.

128

129 2.6 *Isolation of BM Mononuclear Cells (BM-MNCs)*

130

131 The femora and tibiae were harvested from the mice immediately after they were euthanized with  
132 CO<sub>2</sub>. Bone marrow cells were flushed from the bones into Hank's buffered saline solution (HBSS)  
133 containing 2% FCS using a 21-gauge needle and syringe. Cells from at least three mice were pooled  
134 and centrifuged through Histopaque 1083 (Sigma, St. Louis, MO) to isolate bone marrow BM-MNCs  
135 as described previously [10].

136

137 2.7. *Flow Cytometric analysis of Hematopoietic Cells*

138

139 Flow cytometry was used to analyze Hematopoietic Stem Cells (HSCs) and Progenitor cells (HPCs)  
140 as previously described [11]. Briefly, BM-MNCs were incubated with PE-conjugated antibodies  
141 against CD3e, CD45R/B220, Gr-1, Mac-1 and Ter-119 to stain the lineage-positive cells. The cells  
142 were washed with PBS and incubated with anti-CD16/CD32 antibody to block Fc receptors. Finally,  
143 the cells were stained with PE-Cy7 conjugated anti-Sca-1 and APC-H7 conjugated anti-c-kit  
144 antibodies and analyzed using a BD LSRFortessa™ X-20 flow cytometer (Becton Dickinson, San  
145 Jose, CA). The data were analyzed using FlowJo software. Cells stained negative for lineage markers  
146 and c-kit but positive for Sca1 were considered as HPCs (lineage<sup>-</sup>/Sca1<sup>-</sup>/c-kit<sup>+</sup> cells, or LSK<sup>-</sup> cells)  
147 and those negative for lineage markers but positive for Sca1 and c-kit as HSCs (lineage<sup>-</sup>/Sca1<sup>+</sup>/c-kit<sup>+</sup>  
148 cells, or LSK cells).

149

150 2.8 *Flow cytometric analysis of ROS*

151

152 ROS levels were measured in HSCs and HPCs as an *in vivo* indicator of DSBA toxicity by Flow  
153 Cytometry using the probe DCFH-DA. Intracellular ROS were measured by flow cytometric analysis

154 as previously reported [8]. Briefly, Lin<sup>-</sup> HSPCs were loaded with 5 mM of DCF-DA and incubated  
155 at 37 °C for 30 min. The levels of ROS in HSPCs were analyzed by measuring the mean fluorescence  
156 intensity of DCF-DA using a BDLSRFortessa™ X-20 cell analyzer (Becton Dickinson, San Jose,  
157 CA) and FACSDiva™ software. Data analysis was performed using FlowJo software (Tree Star,  
158 Ashland, OR).

159

## 160 2.9 Colony-forming unit assay

161

162 Colony-forming unit (CFU) assays were performed by culturing the isolated BM-MNCs in  
163 MethoCult GF M3434 methylcellulose medium (Stem Cell Technologies) as described previously  
164 [12]. Colonies of colony-forming unit-granulocyte macrophage (CFU-GM) and burst-forming unit-  
165 erythroid (BFU-E) were scored on day 7, while colonies of CFU-granulocyte, -erythrocyte, -  
166 monocyte, and -megakaryocyte (CFU-GEMM) were enumerated on day 12 after incubation.

167

## 168 2.10 Nuclear and cytosolic protein extraction

169

170 Cellular extracts obtained after 4 h of treatment with DSBA (from 5 to 20 μM) were used for these  
171 experiments and cellular proteins were probed before or after fractionation of cytosolic and nuclear  
172 proteins carried out utilizing a Thermo Scientific NE-PER Nuclear and Cytoplasmic Extraction Kit  
173 (Cat# 78833, Thermo Fisher).

174

## 175 2.11 Western blotting analysis

176

177 Protein samples were extracted using cell lysis buffer (Cell Signaling) supplemented with a cocktail  
178 of proteinase inhibitors (Sigma) and protein concentrations were determined using the Bio-Rad Dc  
179 protein assay kit (Bio-Rad Laboratories). Western blots was performed as described in [13]. Briefly,  
180 50 μg of protein samples were resolved on 10% Mini-Protean TGX gels (Bio-Rad) and transferred  
181 onto 0.2 mM PVDF membrane (Millipore). Blots were blocked with 5% nonfat milk for 1–2 h at  
182 room temperature, then probed with primary antibodies, and incubated at 4 °C overnight. Primary  
183 antibodies used were: anti-GSTP, anti-Nrf2 (#12721) and anti-aldehyde dehydrogenase-1 (ALDH1)  
184 (#12035) from Cell Signaling; heme-oxygenase 1 (HO-1) (SC-390991), anti-Nrf2 (SC-772) and  
185 Tubulin (SC-23948) from Santa Cruz Biotechnology. After extensive washing with TBST, blots were  
186 incubated with appropriate HRP-conjugated secondary antibody for 1.5 h at room temperature.

187 Protein bands were detected using an ECL Plus Western Blot Detection System (GE Healthcare Life  
188 Science).

189

### 190 2.12 *GST activity*

191

192 The specific activity of the GST in bone marrow and plasma samples were measured as previously  
193 described in [14] using 5 mM GSH (Sigma-Aldrich, St. Louis, MO) and 0.5 mM CDNB (Merck,  
194 Darmstadt, Germany) as second substrate in 0.1M potassium phosphate buffer pH 6.5 at room  
195 temperature with the Benchmark plus microplate spectrophotometer (BioRad, Hercules, CA) by  
196 following the change in absorbance at 340 nm. The molar extinction coefficient used for CDNB  
197 conjugation was  $9.6 \text{ mM}^{-1}\text{cm}^{-1}$ . Enzymatic activities were calculated after correction for the non-  
198 enzymatic reaction.

199

### 200 2.13 *Immunohistochemical analysis (IHC)*

201

202 Hepatic Nrf2 was measured by immunohistochemistry (IHC) as previously described in [15]. Briefly,  
203 mouse liver tissues were fixed with formalin and embedded in paraffin. Tissue sections (5  $\mu\text{m}$  thick)  
204 were prepared. Endogenous peroxidase activity was blocked by incubation with 3 % hydrogen  
205 peroxide for 30 min and followed by heating in 1mM EDTA for antigen retrieval. The sections were  
206 then blocked with 5 % normal goat serum in 0.1 % Triton X-100/PBS for 1 h and incubated overnight  
207 at 4 degree with rabbit anti-human Nrf2 antibody (1:200, Santa Cruz). After wash with PBS, slides  
208 were incubated with ABC reagent (Vector) for 30 min. Immunostaining was visualized by DAB and  
209 the slides were counterstained using hematoxylin.

210

### 211 2.14 *Statistics*

212

213 Data (as means $\pm$ -SD) were assessed for distribution and differences between variables were assessed  
214 for statistical significance using parametric or non-parametric tests when appropriate.

215

## 216 3 Results

217

### 218 3.1 *In vitro effects of DSBA on liver cell ROS and thiols*

219 To further characterize the liver cell metabolism and redox function of DSBA, we comparatively  
220 assessed the effect of this and other Se-organic drugs on ROS generation and thiol levels of HepaRG  
221 hepatic stem cells and HepG2 hepatocarcinoma cells. DSBA was less effective than Ebselen or the  
222 diselenide precursor (PhSe)<sub>2</sub> in stimulating the generation of cellular ROS that was generally higher  
223 in HepaRG than in HepG2 cells (Figure 1). Accordingly, a slight increase in the generation of cellular  
224 ROS was only observed when HepaRG cells were treated with 50 μM DSBA that is the highest  
225 concentration of the compound tested in this study (Figure 1). In both the cell lines, treatments with  
226 DSBA and the other SeTP at a final concentration of 10 μM did not cause significant reductions of  
227 cell viability (not shown).

228 Lower fluxes of ROS in HepG2 hepatocarcinoma cells compared to HepaRG cells might be explained  
229 by the higher cellular levels of GSH (Table1) and average GSH/GSSG ratio (256 and 170,  
230 respectively;  $p < 0.05$ ). This more reduced environment of HepG2 cells was sustained by the lower  
231 capability of GSH secretion in the extracellular medium (Table1) and protein S-glutathionylation  
232 (Figure 1). In these human hepatocarcinoma cells, DSBA did not change the intra- and extra-cellular  
233 levels of GSH, as well as the cellular levels of GSSG (Table1), but did significantly increase PSSG  
234 levels (Figure 1). Conversely, the more potent TP compound Ebselen [3], stimulated the GSH  
235 metabolism of HepG2 cells, increasing its cellular levels and secretion, and its oxidation to form  
236 PSSG (Figure 1) and GSSG (Table 1) at the cellular level.

237 In HepaRG cells, DSBA, but not Ebselen, significantly increased intracellular GSH (Table1). This  
238 resulted in changes of the GSH/GSSG ratio (from 256 to 200), while a more marked decrease was  
239 found in Ebselen treated cells that showed an average value of 100. Under these conditions neither  
240 compound stimulated a significant increase in PSSG (Figure 1).

241 DSBA inhibited GST activity in HepaRG cells, but not in HepG2 cells (Table1); the latter cell type,  
242 on the contrary, showed GST activity inhibition when treated with Ebselen.

243

### 244 3.2 *DSBA activates liver tissue Nrf2 in vivo*

245 Acute exposure to DSBA at the doses used in this study did not cause overt toxicity as demonstrated  
246 by objective examination of animal behavior and clinical cues, liver histology (Figure 2), and blood  
247 and BM cellular composition and morphology (not shown). IHC analysis revealed that Nrf2  
248 expression levels were markedly increased in mouse liver tissue in a dose-dependent fashion after



249 DSBA injection, showing that DSBA treatment may activate Nrf2 in animal tissues *in vivo* (Figure  
250 2).

251

### 252 **3.3 DSBA modulates the redox signaling of HSPCs *in vivo***

253 Our previous studies have shown that DSBA regulates redox status in various cells *in vitro* (6).  
254 However, it remains to be determined if DSBA affects redox balance in tissues and cells *in vivo*. As  
255 such, we investigated the impact of DSBA on ROS levels in HSPCs of C57 mice. Flow cytometry  
256 data showed that DSBA stimulates ROS generation in both HSCs and HPCs (Figure 3); reaching  
257 peak effect at a dose of 10 mg/kg and decreasing at 50 mg/kg.

258 Since GST plays a significant role in maintaining redox balance, we examined whether DSBA-  
259 mediated increases in ROS were due to inhibition of GST activity. Our data showed that there was  
260 no significant change in plasma GST activity after DSBA treatment (Figure 4A), but such activity  
261 significantly increased in BM-MNCs obtained from animals treated with 50 mg/kg DSBA (Figure  
262 4B). These results imply that DSBA-induced increases in ROS are not likely the consequence of GST  
263 inhibition. In contrast, DSBA-mediated ROS production may trigger a cellular adaptive response  
264 and consequently a slight increase of GST activity in HSPCs.

265

### 266 **3.4 Hematopoietic radioprotection by DSBA correlates with Nrf2 activation in BM-MNCs**

267

268 Nrf2 is a master modulator of cellular antioxidant response transcriptionally regulating expression of  
269 a variety of cytoprotective genes. To elucidate the mechanisms by which DSBA protects HSPCs  
270 against radiation injury, we determined whether this compound impacts Nrf2 signaling in BM  
271 hematopoietic cells. Immunoblot of BM-MNC proteins further confirmed the *in vivo* effects of  
272 DSBA as an Nrf2 activator; besides Nrf2 transcription (forward-feeding, self-regulating), DSBA  
273 treatment increased expression of GSTP and the other Nrf2-dependent genes HO-1 and ALDH1  
274 (Figure 5A); at the same time, Nrf2 protein levels slightly increased after DSBA treatment in the  
275 nuclear fraction of BM-MNCs (Figure 5B); ALDH1 and GSTP proteins were also present in the  
276 nucleus and their levels increased following DSBA (Figure 5B).

277

### 278 **3.5 DSBA protects HSPCs against radiation injury *in vivo***

279

280 The hematopoietic system is highly sensitive to radiation injury and a dose beyond 2 Gy may lead to  
281 BM suppression characterized by neutropenia, lymphocytopenia and thrombocytopenia. In light of  
282 the Fukushima nuclear accident and the increasing risk of radiation-induced BM injury, there is a

283 critical need to develop new countermeasure agents against radiation-induced toxicity. To explore  
284 the therapeutic potential of DSBA as a new radiation protector, we treated C57 mice with this  
285 compound before exposing animals to TBI. CFU assays were employed to measure the colony-  
286 forming capacities of HSPCs. The results showed that DSBA pre-treatment prevented the IR-induced  
287 decrease of CFU-GM, BFU-E and CFU-GEMM numbers (Figure 6), indicating that DSBA does  
288 possess radioprotective properties against IR-induced injury in HSPCs.

#### 290 **4 Discussion**

291 The findings in this study confirm the recently identified *in vitro* activity of DSBA as an Nrf2-  
292 activating seleno-hormetine [4] *in vivo*. Nrf2 activation was demonstrated in the present study  
293 assessing liver tissue and BM HSPCs following sub-cytotoxic concentrations of DSBA in C57 BL/6  
294 mice. The canonical Nrf2 activation model predicts that DSBA generated ROS (in both hepatocytes  
295 and BM) stimulates this transcription factor through dissolution of its interaction with Keap1,  
296 allowing migration to the nucleus promoting antioxidant and electrophile responsive elements [16].  
297 Indeed, the lowest dose of DSBA investigated in this study caused such a response in BM cells,  
298 associated with nuclear translocation of Nrf2 protein and expression of a series of Nrf2-dependent  
299 genes. In these BM cells, GSTP was found to be the most responsive gene followed by ALDH1 and  
300 then HO-1, and GSTP and ALDH1 were also upregulated in the nucleus. In mice treated with 50  
301 mg/kg DSBA, such gene response was associated with lowered ROS levels, implying a rapid and  
302 efficient detoxification response mediated through Nrf2 activation.

303 The observation that DSBA increased hepatic Nrf2 *in vivo* (Figure 2) is in agreement with previous  
304 findings obtained in human liver cells [4]. Since this transcription factor plays a role in hepatic and  
305 systemic metabolism of GSH and Cys [16], and thiol-mediated pathways are implicated in Se-  
306 compound detoxification [1], the influence of DSBA on liver cell glutathione was investigated.  
307 DSBA increased cellular GSH and ROS flux in HepaRG cells with minor effects on GSH secretion  
308 into the extracellular milieu and oxidation to GSSG, effects that are commonly associated with the  
309 exposure to Se-compounds [17] and other electrophiles [18]. The more reduced intracellular  
310 environment of HepG2 cells prevented these effects, with only slightly increased levels of protein S-  
311 glutathionylation, probably dependent upon higher levels of GSTP in this hepatocarcinoma cell line.  
312 Conversely, treatment with other compounds with much higher TP activity, i.e. Ebselen and (PhSe)<sub>2</sub>,  
313 markedly influenced the redox homeostasis of these liver cells. We therefore demonstrated in this  
314 study that DSBA is a relatively safe Se-organic molecule with minor effects on liver cell redox and  
315 low toxicity, even though the drug effects are sufficient to activate Nrf2 and its detoxification gene  
316 response both *in vitro* and *in vivo*.

317 DSBA was also confirmed to inhibition GST activity in HepaRG cells and to stimulate GSTP gene  
318 expression *in vivo*. This is not a trivial observation if we consider that GST is the first and likely the  
319 most important thiol-containing protein identified to react with SeTP, and Cys alkylation of GST  
320 protein is demonstrated promoting Se-compound sequestration and metabolism in the liver [5,6]. This  
321 alkylation reaction produces the irreversible inhibition of GST enzyme activity, a process that was  
322 originally characterized for the prototypal compound Ebselen [6] and a response that is confirmed to  
323 occur in the *in vitro* experiments on liver cells of this study. Alkylating agents are potent *GST* gene  
324 inducers and also a cause of drug resistance [1,19]. GST-overexpressing tumor cells, such as the  
325 hepatocellular carcinoma HepG2 cell line investigated herein, are in fact poorly responsive to the  
326 mild thiol peroxidase activity of DSBA while the reactive compound Ebselen provokes a significant  
327 inhibition of the enzyme activity, then leading to increased GST gene and protein expression  
328 (previously characterized in [3]). In these cells and in other cell models, the GSTP isoform was  
329 demonstrated to be particularly important in provide an efficient cellular response to either the  
330 hormetic or cytotoxic activity of SeTP [3,4]. Intriguingly, such response appears to depend on the  
331 capability of GSTP isoform to functionally and physically interact with Nrf2 protein during the gene  
332 induction process [4].

333 At the same time, GSTP gene expression is enmeshed in pathways that control proliferation and  
334 migration of BM myeloid cells and among these cells, the myeloid lineage is known to be highly  
335 responsive to GSTP-targeted pharmacological agents [20]. Intriguingly, *in vivo* treatment with DSBA  
336 increased GSTP expression both in the cytosol and the nucleus of BM progenitor cells. This finding  
337 is in agreement with the previously reported co-localization of GSTP and Nrf2 in both the cytosolic  
338 and nuclear compartments during drug-induced activation [4]. Therefore, the nuclear availability of  
339 GSTP together with relevant concentrations of protein thiols and GSH in the nuclear environment  
340 [21], make such co-localization potentially strategic for nuclear protection and redox-dependent  
341 regulation of transcriptional processes associated with SeTP detoxification.

342 A novel component of this study was to determine whether DSBA may have *in vivo* hormetic effects.  
343 A total body irradiation model was used for these experiments which is associated with oxidative  
344 stress, causative of BM stem cell damage and subsequent myelosuppression [8]. Our results  
345 conclusively demonstrated that DSBA pretreatment prevents hematopoietic stem cell damage and  
346 death in IR-exposed animals. In this regard, recent studies demonstrated that some redox-active  
347 superoxide dismutase mimics produce similar positive effects on BM cells and behaving  
348 mechanistically in the same fashion [22]. Therefore, these results may be expanded to consider  
349 whether DSBA can be used to manage radiation emergency situations or the types of hematologic  
350 toxicity observed in patients undergoing chemo-radiotherapy [11].

351 In conclusion, DSBA was shown to promote positive hormesis *in vivo*. Mechanistically, Nrf2  
352 activation and downstream GSTP gene induction are confirmed as molecular players of this seleno-  
353 hormetic effect.  
354

356 **Legends to Figures**

357

358 **Figure 1. Reactive oxygen species (A and B) and protein S-glutathionylation (C and D) in**  
359 **HepaRG and HepG2 cells.** HepaRG or HepG2 cells were alternatively treated for 24 hours with 10  
360  $\mu\text{M}$  DSBA,  $\text{PhSe}_2$  or Ebselen then ROS were measured the DCF method. PSSG were assessed in  
361 permeabilized cells by FACS-Scan as described in the text.

362

363 **Figure 2. DSBA activates Nrf2 in liver tissues in vivo.** IHC was employed to assess Nrf2 expression  
364 in liver tissues of C57 BL/6 mice at 24 h after drug treatment. Magnification 400x. Vehicle control  
365 = DMSO.

366

367 **Figure 3. Levels of reactive oxygen species (ROS) in HPCs and HSCs isolated from DSBA-**  
368 **treated C57 BL/6 mice.** BM-MNCs were collected at 24 h after DSBA treatment and subjected to  
369 immune-phenotype assays. DCF-DA staining and flow cytometric analysis were performed to  
370 measure ROS levels in HSCs and HPCs as described previously (8). t-test: \*  $p < 0.05$ , \*\*  $p < 0.01$ .

371

372 **Figure 4. GST activity in C57 BL/6 mice plasma (A) and BM-MNCs (B) after DSBA treatment.**  
373 GST activity in plasma and BM-MNCs was measured at 24 h after DSBA treatment using approach  
374 as described in the methods section. t-test: \* $p < 0.05$ .

375

376 **Figure 5. Transcriptional activation (A) and nuclear translocation (B) of Nrf2 in DSBA-treated**  
377 **BM-MNCs.** Cells were treated for 4h with DSBA at increasing concentrations from 5 to 20  $\mu\text{M}$  and  
378 levels of Nrf2 protein and the Nrf2-dependent genes HO-1, ALDH1, and GSTP were assessed by  
379 immunoblot in cellular extracts before (A) or after fractionation of cytosolic and nuclear components  
380 (B).

381

382 **Figure 6. DSBA pre-treatment protects mouse BM HSPCs against ionizing radiation (IR)-**  
383 **induced injury in vivo.** The clonogenic function of HSPCs was measured using CFU assays (12).  
384 average number of (A) CFU-GM, (B) BFU-E and (C) CFU-GEMM in 20,000 BM-MNCs.

385

386 **Acknowledgments**

387 BD is a fellow of research supported by the FIRC-AIRC grant program for young investigators.

388 The study was supported in part by the University of Perugia grant program “Ricerca di base”.

389 **Author Contributions**

390 **Conceptualization:** Bartolini Desirée, Wang Yanzhong, Giustarini Daniela, Wang Gavin Y.

391 **Data curation:** Bartolini Desirée, Giustarini Daniela, Wang Gavin Y.

392 **Formal analysis:** Bartolini Desirée and Wang Gavin Y

393 **Methodology:** Bartolini Desirée, Wang Yanzhong , Jie Zhang, Torquato Pierangelo and Giustarini  
394 Daniela

395 **Supervision:** Rossi Ranieri, Galli Francesco, Tew Kenneth D. and Townsend, Danyelle M.

396 **Validation:** Bartolini Desirée and Wang Yanzhong

397 **Resources:** Galli Francesco, Tew Kenneth D. and Rossi Ranieri

398 **Writing – original draft:** Bartolini Desirée and Galli Francesco

399

400

401 **References**

- 402 1. Bartolini D, Sancineto L, Fabro de Bem A, Tew KD, Santi C, et al. (2017) Selenocompounds in Cancer  
403 Therapy: An Overview. *Adv Cancer Res* 136: 259-302.
- 404 2. Galli F (2007) Interactions of polyphenolic compounds with drug disposition and metabolism. *Curr Drug*  
405 *Metab* 8: 830-838.
- 406 3. Bartolini D, Piroddi M, Tidei C, Giovagnoli S, Pietrella D, et al. (2015) Reaction kinetics and targeting to  
407 cellular glutathione S-transferase of the glutathione peroxidase mimetic PhSeZnCl and its D,L-  
408 polylactide microparticle formulation. *Free Radic Biol Med* 78: 56-65.
- 409 4. Bartolini D, Comodi J, Piroddi M, Incipini L, Sancineto L, et al. (2015) Glutathione S-transferase pi  
410 expression regulates the Nrf2-dependent response to hormetic diselenides. *Free Radic Biol Med*  
411 88: 466-480.
- 412 5. Nikawa T, Schuch G, Wagner G, Sies H (1994) Interaction of albumin-bound ebselen with rat liver  
413 glutathione S-transferase and microsomal proteins. *Biochem Mol Biol Int* 32: 291-298.
- 414 6. Nikawa T, Schuch G, Wagner G, Sies H (1994) Interaction of ebselen with glutathione S-transferase and  
415 papain in vitro. *Biochem Pharmacol* 47: 1007-1012.
- 416 7. Bartolini D, Galli F (2016) The functional interactome of GSTP: A regulatory biomolecular network at the  
417 interface with the Nrf2 adaption response to oxidative stress. *J Chromatogr B Analyt Technol*  
418 *Biomed Life Sci* 1019: 29-44.
- 419 8. Wang Y, Liu L, Pazhanisamy SK, Li H, Meng A, et al. (2010) Total body irradiation causes residual bone  
420 marrow injury by induction of persistent oxidative stress in murine hematopoietic stem cells. *Free*  
421 *Radic Biol Med* 48: 348-356.
- 422 9. Rossi R, Giustarini D, Colombo G, Milzani A, Dalle-Donne I (2009) Evidence against a role of ketone bodies  
423 in the generation of oxidative stress in human erythrocytes by the application of reliable methods  
424 for thiol redox form detection. *J Chromatogr B Analyt Technol Biomed Life Sci* 877: 3467-3474.
- 425 10. Wang Y, Liu L, Zhou D (2011) Inhibition of p38 MAPK attenuates ionizing radiation-induced  
426 hematopoietic cell senescence and residual bone marrow injury. *Radiat Res* 176: 743-752.
- 427 11. Xiao X, Luo H, Vanek KN, LaRue AC, Schulte BA, et al. (2015) Catalase inhibits ionizing radiation-induced  
428 apoptosis in hematopoietic stem and progenitor cells. *Stem Cells Dev* 24: 1342-1351.
- 429 12. Wang Y, Schulte BA, LaRue AC, Ogawa M, Zhou D (2006) Total body irradiation selectively induces  
430 murine hematopoietic stem cell senescence. *Blood* 107: 358-366.
- 431 13. He X, Yang A, McDonald DG, Riemer EC, Vanek KN, et al. (2017) MiR-34a modulates ionizing radiation-  
432 induced senescence in lung cancer cells. *Oncotarget* 8: 69797-69807.
- 433 14. Zhang J, Shibata A, Ito M, Shuto S, Ito Y, et al. (2011) Synthesis and characterization of a series of highly  
434 fluorogenic substrates for glutathione transferases, a general strategy. *J Am Chem Soc* 133: 14109-  
435 14119.
- 436 15. Yang A, Qin S, Schulte BA, Ethier SP, Tew KD, et al. (2017) MYC Inhibition Depletes Cancer Stem-like  
437 Cells in Triple-Negative Breast Cancer. *Cancer Res* 77: 6641-6650.
- 438 16. Tebay LE, Robertson H, Durant ST, Vitale SR, Penning TM, et al. (2015) Mechanisms of activation of the  
439 transcription factor Nrf2 by redox stressors, nutrient cues, and energy status and the pathways  
440 through which it attenuates degenerative disease. *Free Radic Biol Med* 88: 108-146.
- 441 17. Olm E, Fernandes AP, Hebert C, Rundlof AK, Larsen EH, et al. (2009) Extracellular thiol-assisted selenium  
442 uptake dependent on the x(c)- cystine transporter explains the cancer-specific cytotoxicity of  
443 selenite. *Proc Natl Acad Sci U S A* 106: 11400-11405.
- 444 18. De Nicola M, Ghibelli L (2014) Glutathione depletion in survival and apoptotic pathways. *Front*  
445 *Pharmacol* 5: 267.
- 446 19. Tew KD (1994) Glutathione-associated enzymes in anticancer drug resistance. *Cancer Res* 54: 4313-  
447 4320.
- 448 20. Zhang J, Ye ZW, Gao P, Reyes L, Jones EE, et al. (2014) Glutathione S-transferase P influences redox and  
449 migration pathways in bone marrow. *PLoS One* 9: e107478.
- 450 21. Markovic J, Garcia-Gimenez JL, Gimeno A, Vina J, Pallardo FV (2010) Role of glutathione in cell nucleus.  
451 *Free Radic Res* 44: 721-733.

452 22. Li H, Wang Y, Pazhanisamy SK, Shao L, Batinic-Haberle I, et al. (2011) Mn(III) meso-tetrakis-(N-  
453 ethylpyridinium-2-yl) porphyrin mitigates total body irradiation-induced long-term bone marrow  
454 suppression. *Free Radic Biol Med* 51: 30-37.

455

456



**A**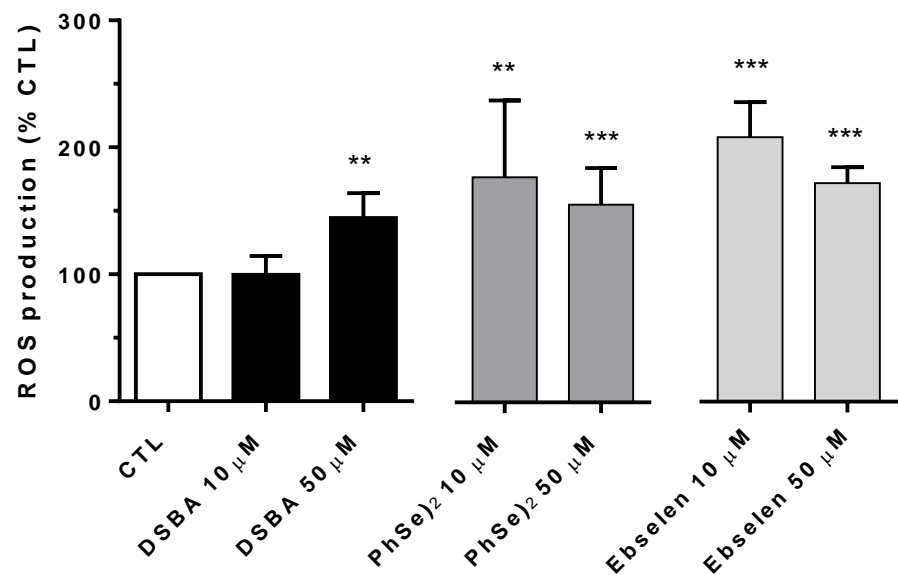**B**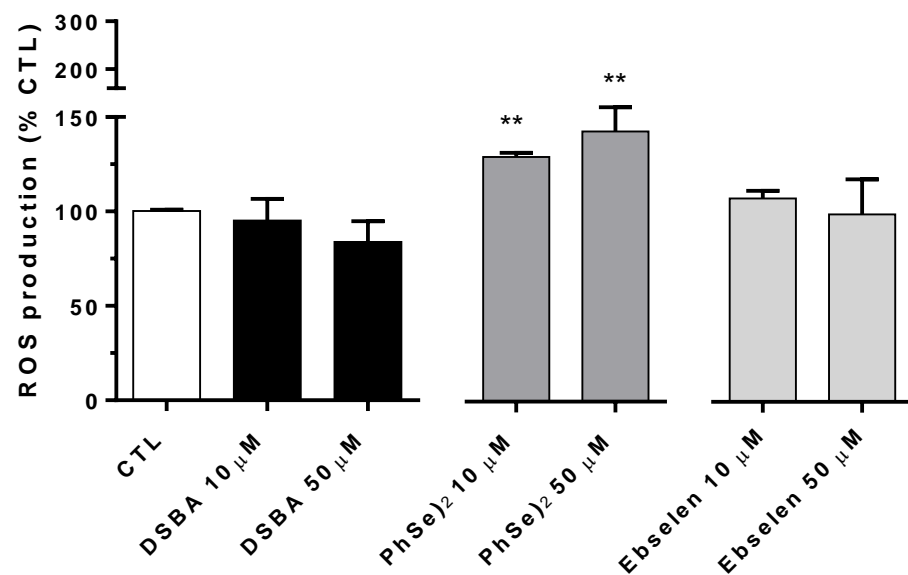

Figure 1

Figure 1

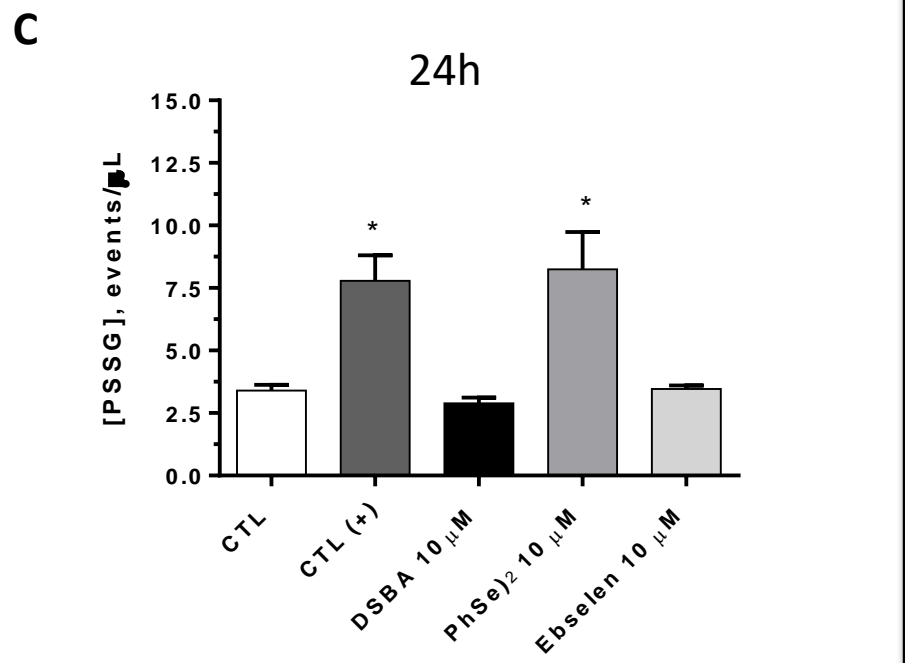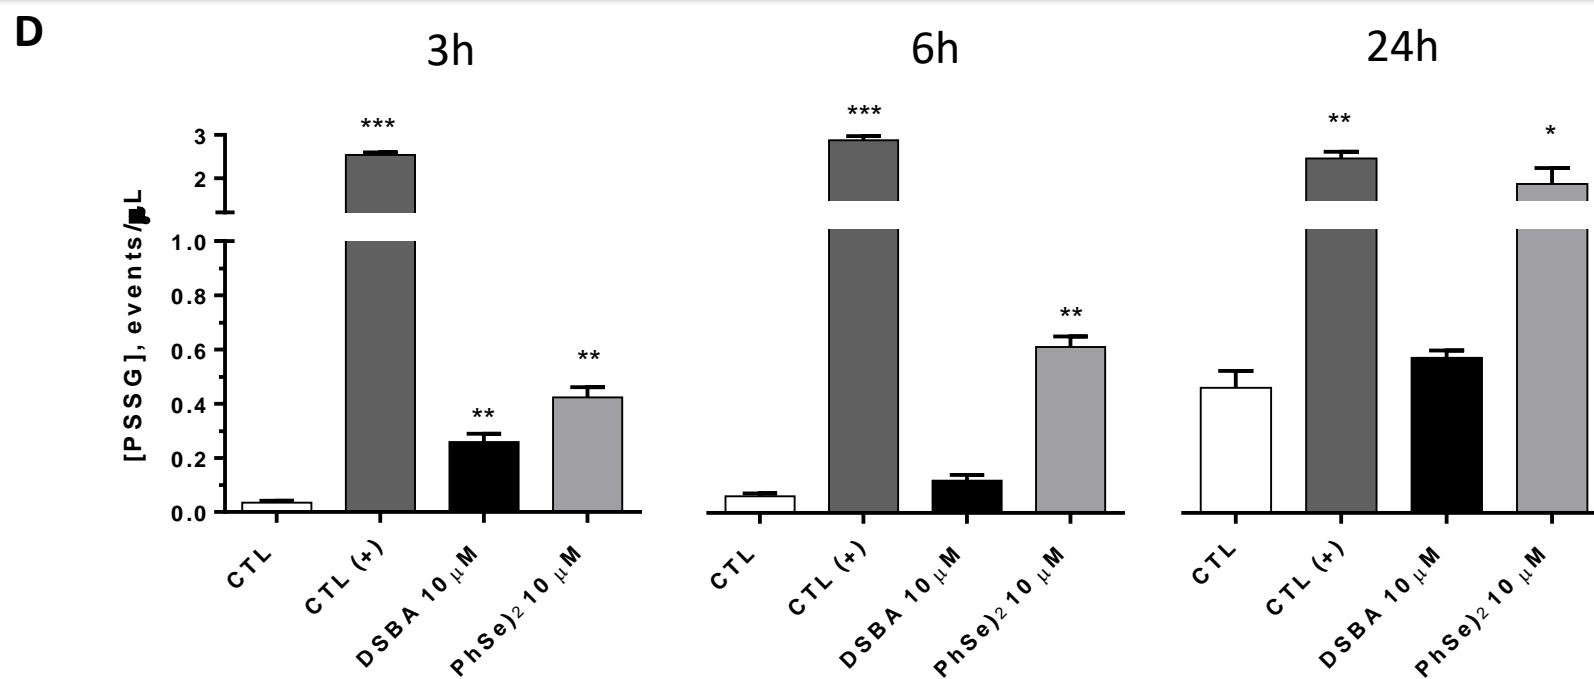

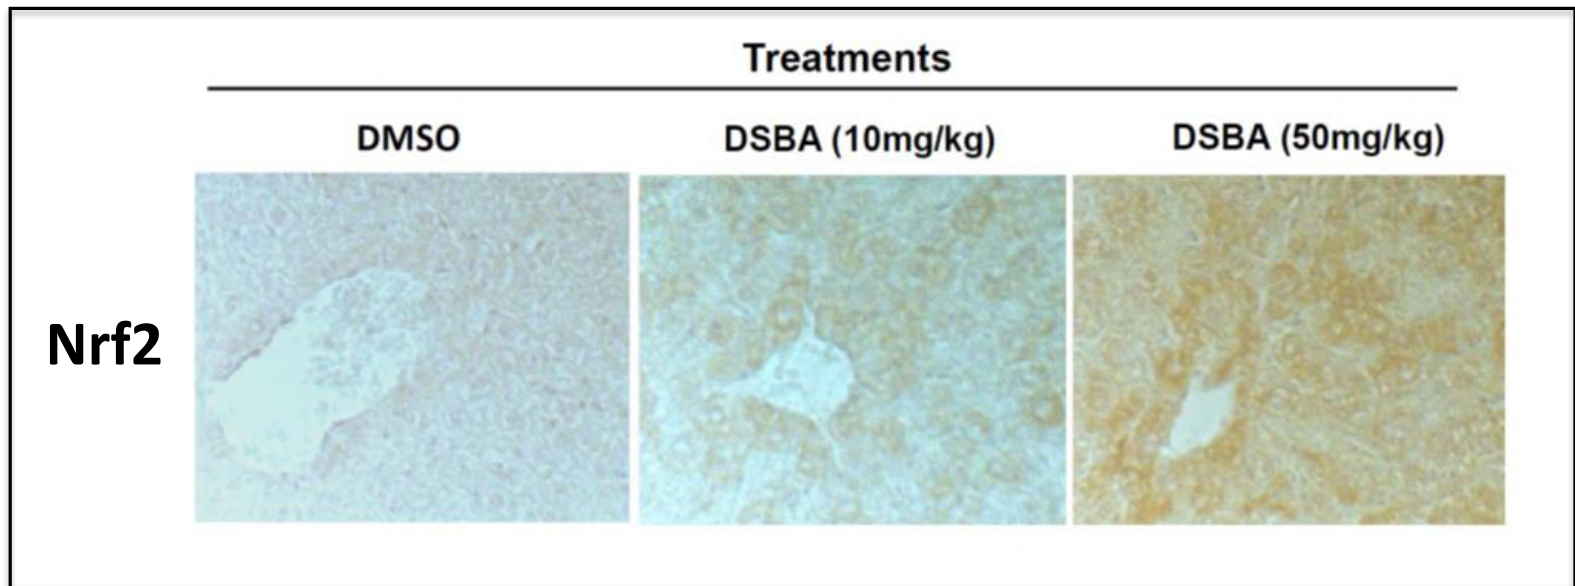

**Figure 2**

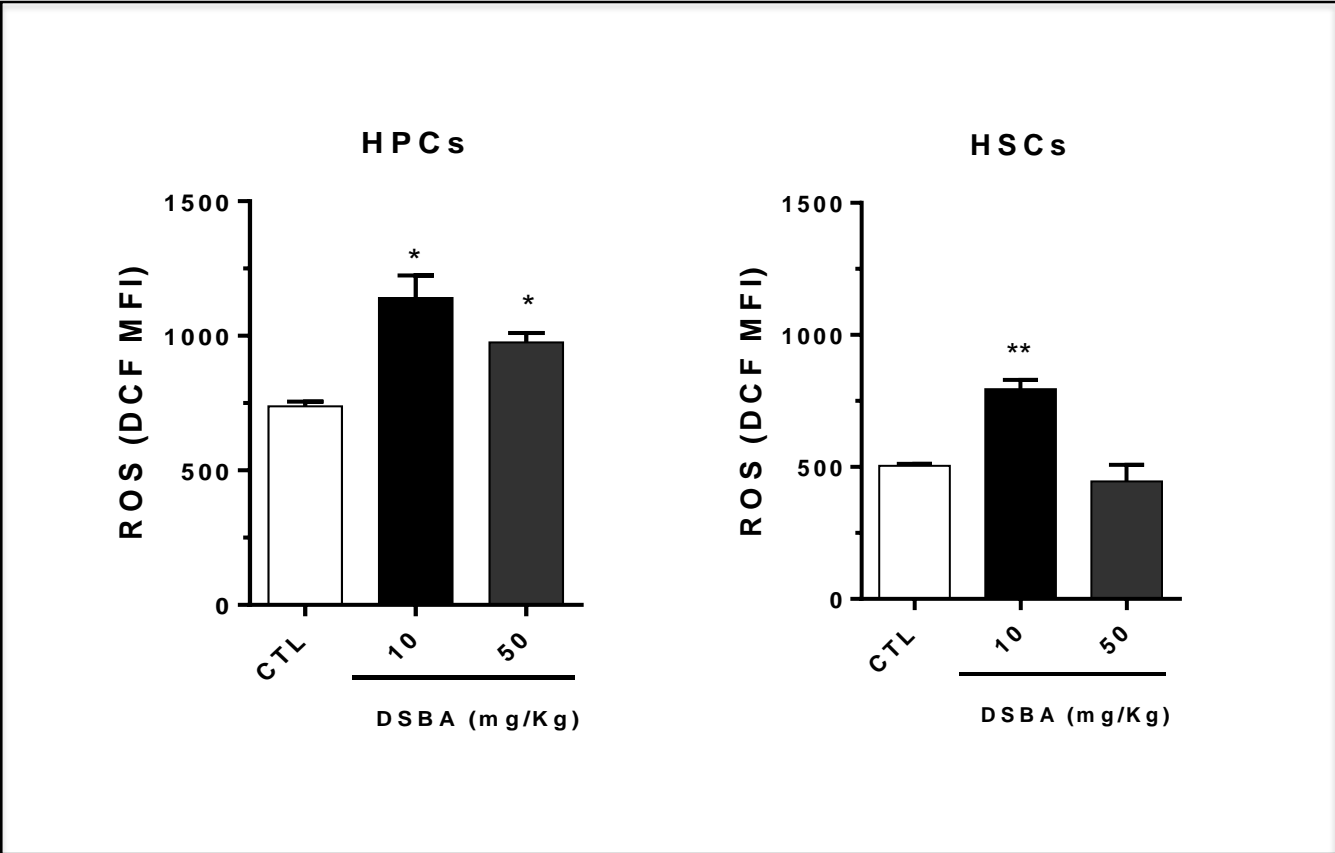

Figure 3

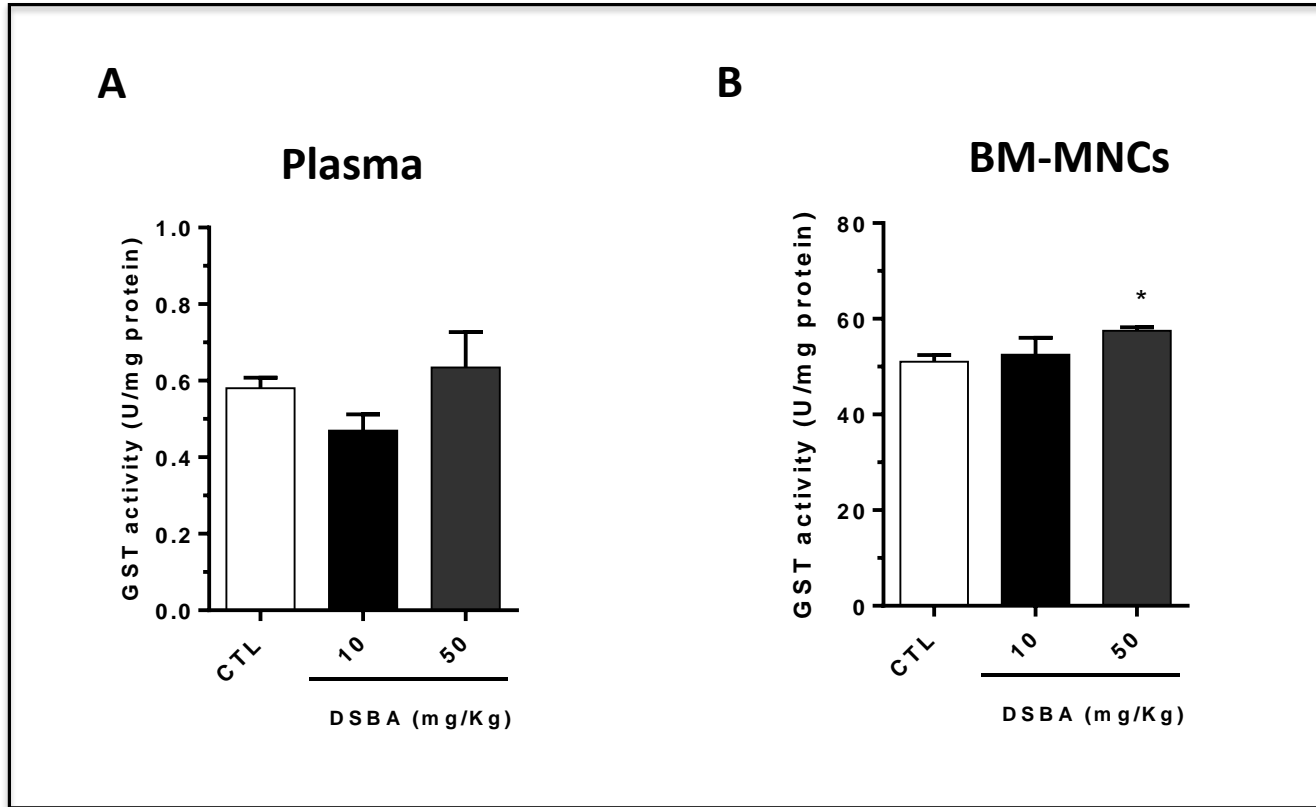

Figure 4

**A**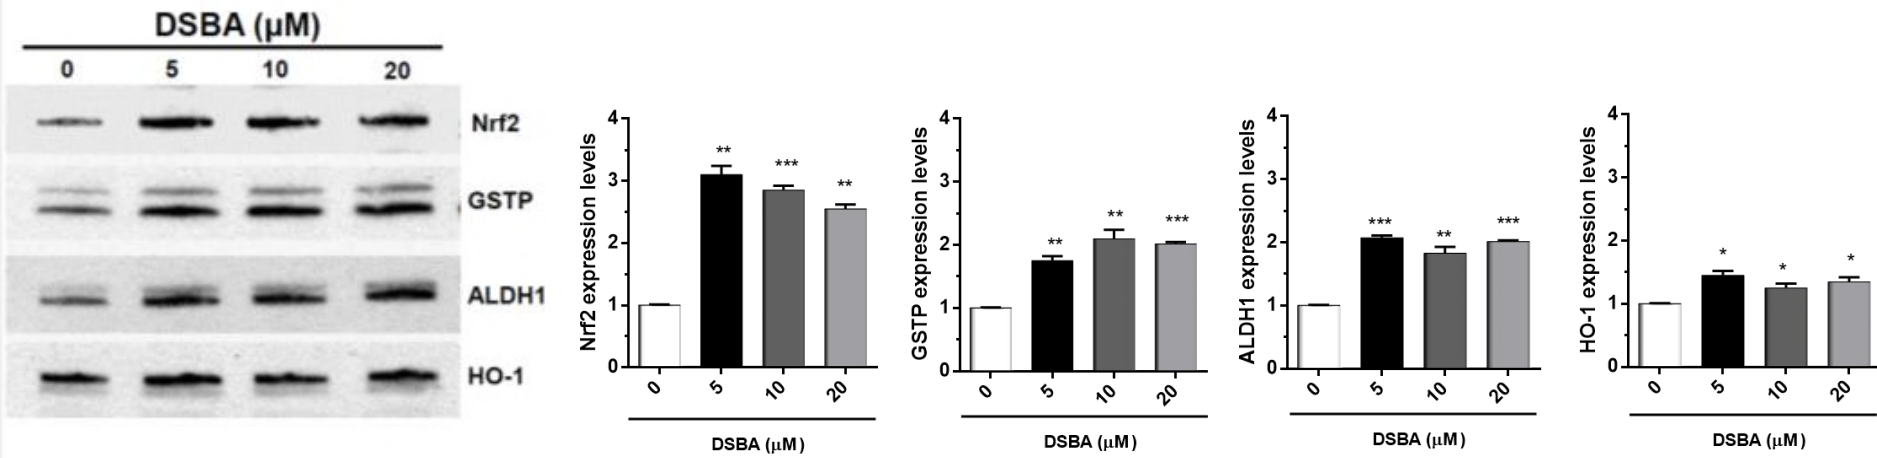**B**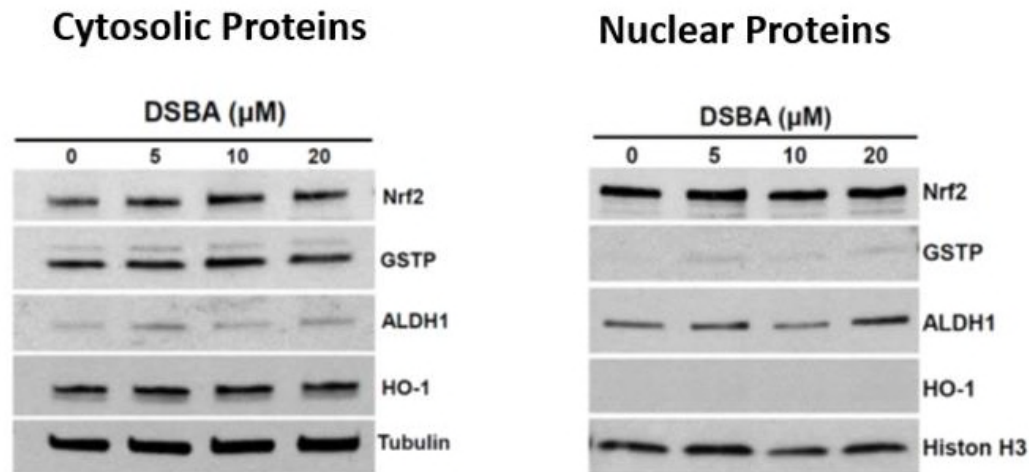**Figure 5**

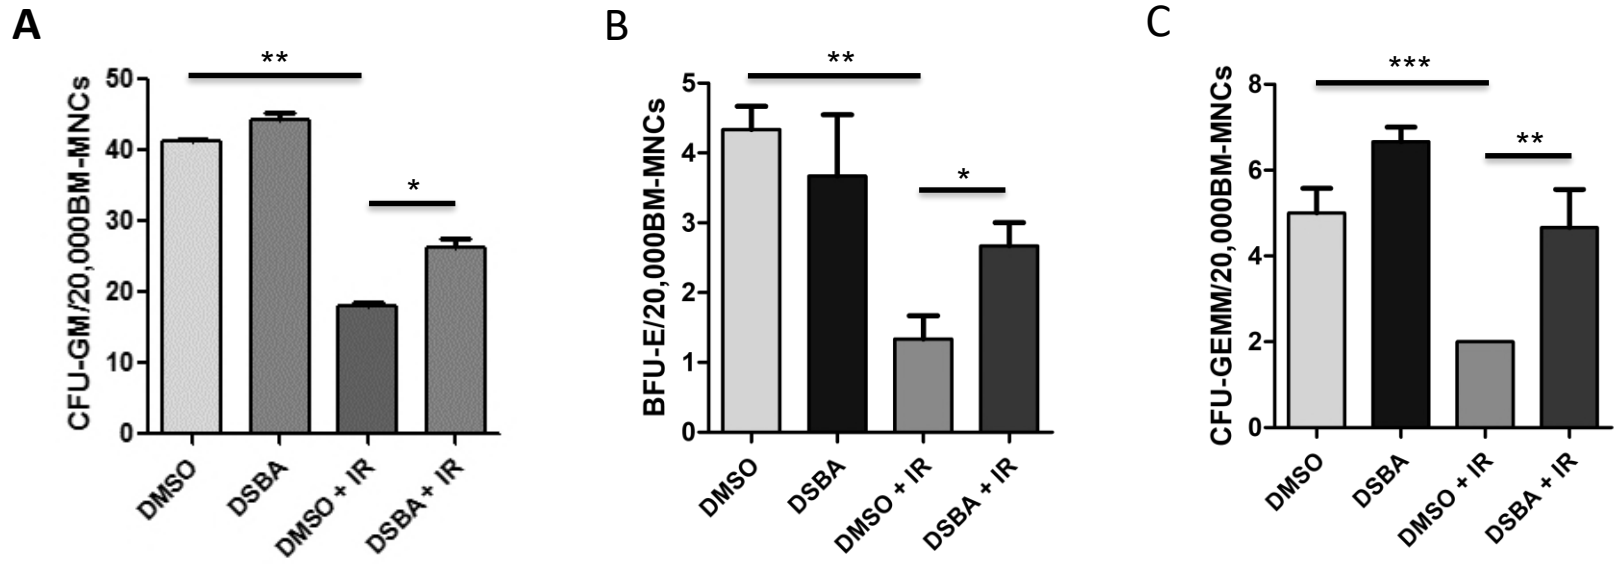

Figure 6

| <b>Table 1. Cellular and extracellular levels of glutathione in tumoral HepG2 and non-tumoral HepaRG human liver cell lines treated for 24 hours with DSBA.</b> |                                                          |                                                          |                                                               |                                            |
|-----------------------------------------------------------------------------------------------------------------------------------------------------------------|----------------------------------------------------------|----------------------------------------------------------|---------------------------------------------------------------|--------------------------------------------|
|                                                                                                                                                                 | <b>Intracellular GSH<br/>(nmol/10<sup>6</sup> cells)</b> | <b>Extracellular GSH<br/>(nmol/10<sup>6</sup> cells)</b> | <b>Intracellular<br/>GSSG<br/>(nmol/10<sup>6</sup> cells)</b> | <b>GST activity<br/>(U/mg of proteins)</b> |
| <b>HepG2 cells</b>                                                                                                                                              |                                                          |                                                          |                                                               |                                            |
| CTL                                                                                                                                                             | 33.3 ± 5.37                                              | 2.25 ± 1.41                                              | 0.13 ± 0.03                                                   | 53.4 ± 6.64                                |
| DSBA 10 µM                                                                                                                                                      | 31.5 ± 5.12                                              | 3.32 ± 1.50                                              | 0.15 ± 0.05                                                   | 57.2 ± 0.65                                |
| DSBA 50 µM                                                                                                                                                      | 27.2 ± 6.2                                               | 2.48 ± 1.2                                               | 0.12 ± 0.04                                                   | 41.0 ± 10.03*                              |
| Ebselen 10 µM                                                                                                                                                   | 45.0 ± 5.0                                               | 4.40 ± 1.31 **                                           | 0.18 ± 0.05 *                                                 | 23.2 ± 8.31**                              |
| Ebselen 50 µM                                                                                                                                                   | 50.3 ± 4.2 *                                             | 5.06 ± 2.0 **                                            | 0.40 ± 0.06 **                                                | 43.1 ± 2.21*                               |
| <b>HepaRG cells</b>                                                                                                                                             |                                                          |                                                          |                                                               |                                            |
| CTL                                                                                                                                                             | 18.7 ± 2.12                                              | 10.25 ± 3.70                                             | 0.11 ± 0.01                                                   | 18.2 ± 0.63                                |
| DSBA 10 µM                                                                                                                                                      | 25.60 ± 4.3 *                                            | 13.85 ± 5.2                                              | 0.13 ± 0.03 *                                                 | 6.8 ± 0.19 *                               |
| Ebselen 10 µM                                                                                                                                                   | 18.80 ± 5.0                                              | 16.54 ± 4.31 *                                           | 0.18 ± 0.07 **                                                | 16.3 ± 0.07                                |
| t-test: CTL (vehicle = DMSO) vs treatment *p<0.05; **p<0.01.<br>Data in parentheses are the percentage of activity calculated on the CTL.                       |                                                          |                                                          |                                                               |                                            |
